# Supplementary material
Source: Springer Nature journal article supplement (https://www.springermedizin.de/resource/supplementary/12891_2012_1711_MOESM1_ESM.pdf/9508954)
Supplement: MOESM1 [file 9508954]

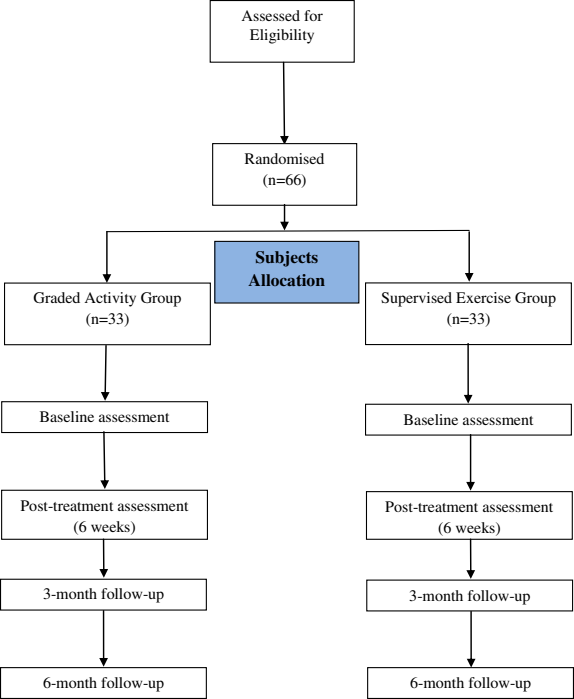

Assessed for  
Eligibility

Randomised  
(n=66)

**Subjects  
Allocation**

Graded Activity Group  
(n=33)

Supervised Exercise Group  
(n=33)

Baseline assessment

Baseline assessment

Post-treatment assessment  
(6 weeks)

Post-treatment assessment  
(6 weeks)

3-month follow-up

3-month follow-up

6-month follow-up

6-month follow-up
